# Supplementary material for: Trends in incidence of total or type 2 diabetes: systematic review
Source: PubMed Central journal article supplement — BMJ. 2019 Sep 11;366:l5003. doi: 10.1136/bmj.l5003 (PMC6737490; doi:10.1136/bmj.l5003), 2019-09-11

## **Supplementary material**

This document provides supplementary material for the manuscript: Trends in incidence of total or type 2 diabetes: a systematic review.

The information in the document is intended to provide additional detail for data extraction and analyses.

## **Search Strategy**

We searched MEDLINE, EMBASE and CINAHL from 1 January 1980 until 31 December 2017 without language restrictions. We conducted two searches and combined the results (Table 1). In the first search, we used the following medical subject heading (MeSH) terms: Diabetes Mellitus, Type 2/ep [Epidemiology], Diabetes Mellitus, Type 2/ or Diabetes Mellitus/, Glucose Intolerance/ep [Epidemiology], Diabetes Mellitus/ep [Epidemiology] AND Incidenc/, "inciden".m\_titl. For the second search, we used the following MeSH terms: Diabetes Mellitus, Type 2/ep [Epidemiology], Diabetes Mellitus, Type 2/ or Diabetes Mellitus/, Glucose Intolerance/ep [Epidemiology], Diabetes Mellitus/ep [Epidemiology] AND follow up studies/, cohort studies/, longitudinal studies/, and prospective studies. We also 'hand' searched reference lists of the identified reports to identify eligible articles.

**Table 1: Details of the Search Strategy**

---

Database: Ovid MEDLINE(R) 1946 to Present with Daily Update  
Search Strategy:1980-2017

---

|    |                                                                                                                                                                                                                                                                                                                                                                                                                                                                               |
|----|-------------------------------------------------------------------------------------------------------------------------------------------------------------------------------------------------------------------------------------------------------------------------------------------------------------------------------------------------------------------------------------------------------------------------------------------------------------------------------|
| 1  | Diabetes Mellitus, Type 2/ep [Epidemiology]                                                                                                                                                                                                                                                                                                                                                                                                                                   |
| 2  | Diabetes Mellitus/ep [Epidemiology]                                                                                                                                                                                                                                                                                                                                                                                                                                           |
| 3  | Glucose Intolerance/ep [Epidemiology]                                                                                                                                                                                                                                                                                                                                                                                                                                         |
| 4  | Diabetes Mellitus, Type 2/ or Diabetes Mellitus/                                                                                                                                                                                                                                                                                                                                                                                                                              |
| 5  | "inciden*".m_titl.                                                                                                                                                                                                                                                                                                                                                                                                                                                            |
| 6  | Incidence/                                                                                                                                                                                                                                                                                                                                                                                                                                                                    |
| 7  | 5 or 6                                                                                                                                                                                                                                                                                                                                                                                                                                                                        |
| 8  | Follow-up studies/                                                                                                                                                                                                                                                                                                                                                                                                                                                            |
| 9  | Cohort studies/                                                                                                                                                                                                                                                                                                                                                                                                                                                               |
| 10 | Prospective studies/                                                                                                                                                                                                                                                                                                                                                                                                                                                          |
| 11 | Longitudinal studies/                                                                                                                                                                                                                                                                                                                                                                                                                                                         |
| 12 | 1 or 2 or 3 or 4                                                                                                                                                                                                                                                                                                                                                                                                                                                              |
| 13 | 8 or 9 or 10 or 11                                                                                                                                                                                                                                                                                                                                                                                                                                                            |
| 14 | 7 and 12                                                                                                                                                                                                                                                                                                                                                                                                                                                                      |
| 15 | 12 and 13                                                                                                                                                                                                                                                                                                                                                                                                                                                                     |
| 16 | 14 or 15                                                                                                                                                                                                                                                                                                                                                                                                                                                                      |
| 17 | Pragmatic Clinical Trial/ or Clinical Trial, Phase III/ or Randomized Controlled Trial/ or Trial.mp. or Clinical Trial, Phase II/ or "Trial of Labor"/ or Clinical Trial, Phase I/ or Clinical Trial, Phase IV/ or Clinical Trial/ or Controlled Clinical Trial.mp. [mp=title, abstract, original title, name of substance word, subject heading word, keyword heading word, protocol supplementary concept word, rare disease supplementary concept word, unique identifier] |
| 18 | 16 not 17                                                                                                                                                                                                                                                                                                                                                                                                                                                                     |
| 19 | animals/                                                                                                                                                                                                                                                                                                                                                                                                                                                                      |
| 20 | 18 not 19                                                                                                                                                                                                                                                                                                                                                                                                                                                                     |
| 21 | Letter/                                                                                                                                                                                                                                                                                                                                                                                                                                                                       |
| 22 | 20 not 21                                                                                                                                                                                                                                                                                                                                                                                                                                                                     |
| 23 | limit 22 to yr="1980 – end of 2017"                                                                                                                                                                                                                                                                                                                                                                                                                                           |

---

**Table 2. Format of incidence data and types of subgroups reported**

| Author,<br>Year                  | Data presented |       |                           |              | Subgroups reported |                  |           |
|----------------------------------|----------------|-------|---------------------------|--------------|--------------------|------------------|-----------|
|                                  | Country        | Crude | Adjusted/<br>Standardised | Age<br>group | Sex                | Diabetes<br>type | Ethnicity |
| Oster, 2011 <sup>12</sup>        | Canada         | No    | Yes                       | No           | No                 | Both             | Yes       |
| Dyck, 2010 <sup>16</sup>         | Canada         | No    | Yes                       | No           | Yes                | Both             | Yes       |
| CCDSS, 2017 <sup>19</sup>        | Canada         | Yes   | No                        | Yes          | Yes                | Both             | No        |
| Blanchard, 1996 <sup>20</sup>    | Canada         | Yes   | Yes                       | Yes          | Yes                | Total            | No        |
| Green, 2003 <sup>21</sup>        | Canada         | Yes   | Yes                       | No           | No                 | Both             | Yes       |
| Alangh, 2013 <sup>22</sup>       | Canada         | No    | Yes                       | No           | No                 | Total            | Yes       |
| Horn, 2007 <sup>24</sup>         | Canada         | Yes   | Yes                       | Yes          | Yes                | Type 2           | No        |
| Lipscombe, 2007 <sup>23</sup>    | Canada         | Yes   | Yes                       | Yes          | Yes                | Total            | No        |
| Liu, 2007 <sup>25</sup>          | China          | Yes   | No                        | No           | No                 | Type 2           | No        |
| Carstensen, 2008 <sup>26</sup>   | Denmark        | Yes   | Yes                       | No           | Yes                | Total            | No        |
| Green, 2015 <sup>27</sup>        | Denmark        | Yes   | Yes                       | No           | Yes                | Total            | No        |
| Abouzeid, 2015 <sup>28</sup>     | Finland        | Yes   | No                        | No           | Yes                | Type 2           | No        |
| Laakso, 1991 <sup>29</sup>       | Finland        | No    | Yes                       | No           | Yes                | Total            | No        |
| Michaeli, 1993 <sup>30</sup>     | Germany        | Yes   | No                        | No           | No                 | Both             | No        |
| Boehme, 2015 <sup>31</sup>       | Germany        | No    | Yes                       | Yes          | Yes                | Type 2           | No        |
| Quan, 2017 <sup>32</sup>         | Hong Kong      | No    | Yes                       | No           | Yes                | Total            | No        |
| Vilbergsson, 1997 <sup>33</sup>  | Iceland        | No    | Yes                       | No           | Yes                | Type 2           | No        |
| Karpati, 2014 <sup>34</sup>      | Israel         | Yes   | Yes                       | Yes          | No                 | Both             | No        |
| Monesi, 2011 <sup>35</sup>       | Italy          | Yes   | Yes                       | Yes          | Yes                | Both             | No        |
| Song, 2016 <sup>36</sup>         | Korea          | Yes   | No                        | No           | Yes                | Total            | No        |
| Soderberg, 2004 <sup>15</sup>    | Mauritius      | Yes   | Yes                       | Yes          | Yes                | Type 2           | Yes       |
| Dowse, 1991 <sup>37</sup>        | Nauru          | Yes   | Yes                       | No           | No                 | Type 2           | No        |
| Ruwaard, 1996 <sup>38</sup>      | Netherlands    | No    | Yes                       | Yes          | Yes                | Total            | No        |
| Strom, 2014 <sup>39</sup>        | Norway         | Yes   | No                        | No           | Yes                | Total            | No        |
| De Sousa-Uva, 2016 <sup>11</sup> | Portugal       | No    | Yes                       | Yes          | Yes                | Both             | No        |
| Evans, 2007 <sup>40</sup>        | Scotland       | Yes   | No                        | No           | No                 | Type 2           | No        |
| Read, 2016 <sup>41</sup>         | Scotland       | No    | Yes                       | No           | Yes                | Type 2           | No        |
| Ringborg, 2008 <sup>45</sup>     | Sweden         | Yes   | Yes                       | Yes          | No                 | Type 2           | No        |
| Berger, 1999 <sup>42</sup>       | Sweden         | Yes   | No                        | No           | No                 | Total            | No        |
| Jansson, 2015 <sup>43</sup>      | Sweden         | No    | Yes                       | Yes          | Yes                | Both             | No        |
| Jansson, 2007 <sup>44</sup>      | Sweden         | Yes   | Yes                       | Yes          | Yes                | Both             | No        |
| Huber, 2014 <sup>46</sup>        | Switzerland    | Yes   | Yes                       | Yes          | Yes                | Total            | No        |
| Lin, 2013 <sup>47</sup>          | Taiwan         | Yes   | Yes                       | Yes          | Yes                | Type 2           | No        |
| Tseng, 2006 <sup>48</sup>        | Taiwan         | Yes   | No                        | Yes          | Yes                | Type 2           | No        |
| Holden, 2013 <sup>49</sup>       | UK             | Yes   | Yes                       | Yes          | Yes                | Type 2           | No        |
| Zghebi, 2017 <sup>50</sup>       | UK             | No    | Yes                       | Yes          | Yes                | Type 2           | No        |
| Abraham, 2015 <sup>7</sup>       | US             | Yes   | Yes                       | No           | No                 | Total            | No        |

| <b>Author,<br/>Year</b>        | <b>Country</b>     | <b>Crude</b> | <b>Adjusted/<br/>Standardised</b> | <b>Age<br/>group</b> | <b>Sex</b> | <b>Diabetes<br/>type</b> | <b>Ethnicity</b> |
|--------------------------------|--------------------|--------------|-----------------------------------|----------------------|------------|--------------------------|------------------|
| Akushevich, 2013 <sup>51</sup> | US                 | No           | Yes                               | No                   | No         | Total                    | No               |
| Burke, 2002 <sup>52</sup>      | US                 | Yes          | Yes                               | Yes                  | Yes        | Total                    | No               |
| CDC, 2008 <sup>53</sup>        | US                 | Yes          | Yes                               | No                   | No         | Total                    | No               |
| Geiss, 2014 <sup>6</sup>       | US                 | No           | Yes                               | Yes                  | Yes        | Both                     | Yes              |
| McBean, 2004 <sup>54</sup>     | US                 | No           | Yes                               | Yes                  | Yes        | Both                     | Yes              |
| Nichols, 2015 <sup>56</sup>    | US                 | Yes          | Yes                               | Yes                  | Yes        | Total                    | Yes              |
| Tabaei, 2012 <sup>57</sup>     | US                 | Yes          | Yes                               | No                   | No         | Both                     | No               |
| Weng, 2016 <sup>9</sup>        | US                 | Yes          | No                                | Yes                  | Yes        | Type 2                   | No               |
| Narayanan, 2010 <sup>55</sup>  | US, Alaska         | No           | Yes                               | No                   | No         | Total                    | Yes              |
| Pavkov, 2007 <sup>58</sup>     | US Pima<br>Indians | No           | Yes                               | Yes                  | No         | Type 2                   | No               |

Notes: CCDSS- Canadian Chronic Disease Surveillance System, CDC- Centers for Disease Control and Prevention.

**Table 3: Annual percentage change across time-periods among studies without counts and denominator data.**

| Author, year                                                 |   | Country  | Annual present change (%) in incidence, p value |             |                  |             |             |
|--------------------------------------------------------------|---|----------|-------------------------------------------------|-------------|------------------|-------------|-------------|
|                                                              |   |          | 1970–1979                                       | 1980–1989   | 1990–1999        | 2000–2005   | 2006–2014   |
| Oster et al 2011 <sup>12</sup> ,<br>Indigenous<br>population | T | Canada   |                                                 |             |                  | 1.1, <0.001 |             |
| Oster et al 2011 <sup>12</sup> ,<br>General population       | T | Canada   |                                                 |             |                  | 4.6, <0.001 |             |
| Green et al 2015 <sup>27</sup>                               | M | Denmark  |                                                 |             | Not<br>estimated | 2.5, <0.01  | 2.5, <0.001 |
| Green et al 2015 <sup>27</sup>                               | F | Denmark  |                                                 |             | Not<br>estimated | 2.3, <0.001 | 2.3, <0.001 |
| Laakso et al 1991 <sup>29</sup>                              | M | Finland  | 1.5, 0.20                                       | 3.2, <0.001 |                  |             |             |
| Laakso et al 1991 <sup>29</sup>                              | F | Finland  | 2.1, 0.79                                       | 3.0, <0.001 |                  |             |             |
| Monesi et al 2011 <sup>35</sup>                              | T | Italy    |                                                 |             |                  | -1.1 0.20   |             |
| Evans et al 2007 <sup>40</sup>                               | T | Scotland |                                                 |             | 5.8, <0.001      | 5.60, 0.004 |             |
| Holden et al 2013 <sup>49</sup>                              | M | UK       |                                                 |             | 11.8, <0.001     | 5.0, 0.63   | 8.1, <0.001 |
| Holden et al 2013 <sup>49</sup>                              | F | UK       |                                                 |             | 13.2, <0.001     | -4.5, 0.21  | 8.5, <0.001 |
| Akushevich et al<br>2013 <sup>51</sup>                       | T | US       |                                                 |             | -1.1, 0.49       | 2.30, 0.16  |             |

Notes: Analyses completed using Joinpoint, assuming constant variance.

## **Quality score**

This scale below includes items that assess representativeness of the study population, sample size at each time period, whether the outcome of interest was present or not at the baseline of the study, the method of assessing outcomes, adequacy of follow-up, whether the incidence rate was adjusted/standardized, and number of data points reported. The maximum score was 13 and final scores were defined as low quality (score 0 – 4), medium (score 5 –7), or high quality (score 8 – 13).

## **Modified Newcastle-Ottawa Quality Assessment Scale for trends in incidence of diabetes**

A study can be awarded a maximum of one, two or three points for each numbered item within each category.

### **Selection**

1. Representativeness of the general population (sampling frame).
  - a) National population based (2 points) eg: national insurance or administrative data or national registry
  - b) Non-national population based (1 point) eg: regional, population-based surveys
  - c) Selected group e.g. patient group; employees; insured population, in a country without universal insurance or no description (0 points)
2. Sample size at each time period
  - a) >10,000 (1 point)
  - b) ≤10,000 (0 points)
3. Indication in the paper that outcome of interest (diabetes) was not present at start of study (at baseline)
  - a) Yes (1 point)
  - b) No (0 points)

### **Outcome**

1. Assessment of outcome.
  - a) Screening of total adult population for undiagnosed diabetes (FPG, OGTT, HbA1c) (4 points)
  - b) Administrative algorithm where at least two criteria are used (3 points)
  - c) Record linkage (Clinical diagnosis) or ICD code (2 points)

- d) Self-report (1 point)
  - e) No description (0 points)
2. Data capture and adequacy of follow up of cohorts/surveys.
- a) Insurance/electronic databases (2 points)
  - b) Medical records (2 points)
  - c) Cohort/survey follow up >80% (2 points)
  - d) Cohort/survey follow up 60 – 80% (1 point)
  - e) Cohort/survey follow up <60% or no statement (0 points)

**Comparability**

1. Is the incidence rate adjusted/standardized for at least age?
- a) Yes (1 point)
  - b) No (0 points)

**Completeness of trend data**

1. How many time periods are reported?
- a)  $\geq 10$  (2 points)
  - b) 5 – 9 (1 point)
  - c) <5 (0 points)

**Maximum score= 13 which can be obtained**

**Table 4: Quality assessment of the included studies**

| Author, Year                    | Country   | Representativeness | Sample size at time periods | Presence of outcome at baseline | Outcome assessment | Follow-up adequacy | Comparability (adjusted/standardised) | Completeness (no. of data points) | Total Score |
|---------------------------------|-----------|--------------------|-----------------------------|---------------------------------|--------------------|--------------------|---------------------------------------|-----------------------------------|-------------|
| Range                           |           | <b>0–2</b>         | <b>0–1</b>                  | <b>0–1</b>                      | <b>0–4</b>         | <b>0–2</b>         | <b>0–1</b>                            | <b>0–2</b>                        | <b>13</b>   |
| Oster, 2011 <sup>12</sup>       | Canada    | 2                  | 1                           | 1                               | 3                  | 2                  | 1                                     | 2                                 | 12          |
| Dyck, 2010 <sup>16</sup>        | Canada    | 2                  | 1                           | 1                               | 3                  | 2                  | 1                                     | 2                                 | 12          |
| CCDSS, 2017 <sup>19</sup>       | Canada    | 2                  | 1                           | 1                               | 3                  | 2                  | 0                                     | 2                                 | 11          |
| Blanchard, 1996 <sup>20</sup>   | Canada    | 2                  | 1                           | 0                               | 3                  | 2                  | 1                                     | 1                                 | 10          |
| Green, 2003 <sup>21</sup>       | Canada    | 1                  | 1                           | 1                               | 2                  | 2                  | 1                                     | 2                                 | 10          |
| Alangh, 2013 <sup>22</sup>      | Canada    | 2                  | 1                           | 1                               | 2                  | 2                  | 1                                     | 0                                 | 9           |
| Lipscombe, 2007 <sup>23</sup>   | Canada    | 2                  | 1                           | 0                               | 3                  | 2                  | 1                                     | 1                                 | 10          |
| Horn, 2007 <sup>24</sup>        | Canada    | 1                  | 0                           | 1                               | 3                  | 2                  | 1                                     | 1                                 | 9           |
| Liu, 2007 <sup>25</sup>         | China     | 2                  | 1                           | 0                               | 2                  | 2                  | 0                                     | 1                                 | 8           |
| Carstensen, 2008 <sup>26</sup>  | Denmark   | 2                  | 1                           | 1                               | 3                  | 2                  | 1                                     | 2                                 | 12          |
| Green, 2015 <sup>27</sup>       | Denmark   | 2                  | 1                           | 1                               | 3                  | 2                  | 1                                     | 2                                 | 12          |
| Abouzeid, 2015 <sup>28</sup>    | Finland   | 1                  | 1                           | 1                               | 1                  | 1                  | 0                                     | 0                                 | 5           |
| Laakso, 1991 <sup>29</sup>      | Finland   | 1                  | 1                           | 1                               | 2                  | 2                  | 1                                     | 2                                 | 10          |
| Michaelis, 1993 <sup>30</sup>   | Germany   | 2                  | 1                           | 1                               | 2                  | 2                  | 0                                     | 1                                 | 9           |
| Boehme, 2015 <sup>31</sup>      | Germany   | 1                  | 1                           | 1                               | 3                  | 2                  | 1                                     | 0                                 | 9           |
| Quan, 2017 <sup>32</sup>        | Hong Kong | 2                  | 1                           | 1                               | 3                  | 2                  | 1                                     | 1                                 | 11          |
| Vilbergsson, 1997 <sup>33</sup> | Iceland   | 1                  | 0                           | 1                               | 4                  | 1                  | 1                                     | 0                                 | 8           |
| Karpati, 2014 <sup>34</sup>     | Israel    | 2                  | 1                           | 1                               | 3                  | 2                  | 1                                     | 1                                 | 11          |
| Monesi, 2011 <sup>35</sup>      | Italy     | 2                  | 1                           | 1                               | 2                  | 2                  | 1                                     | 1                                 | 11          |
| Song, 2016 <sup>36</sup>        | Korea     | 2                  | 1                           | 0                               | 2                  | 2                  | 0                                     | 1                                 | 8           |
| Soderberg, 2004 <sup>15</sup>   | Mauritius | 1                  | 0                           | 1                               | 4                  | 1                  | 1                                     | 0                                 | 8           |
| Dowse, 1991 <sup>37</sup>       | Nauru     | 2                  | 0                           | 1                               | 4                  | 2                  | 1                                     | 0                                 | 10          |
| Strom, 2014 <sup>39</sup>       | Norway    | 2                  | 1                           | 0                               | 1                  | 2                  | 0                                     | 1                                 | 7           |



| Author, Year                    | Country         | Representativeness | Sample size at time periods | Presence of outcome at baseline | Outcome assessment | Follow-up adequacy | Comparability (adjusted/standardised) | Completeness (no. of data points) | Total Score |
|---------------------------------|-----------------|--------------------|-----------------------------|---------------------------------|--------------------|--------------------|---------------------------------------|-----------------------------------|-------------|
| deSouza_Uva, 2016 <sup>11</sup> | Portugal        | 1                  | 1                           | 0                               | 2                  | 2                  | 1                                     | 1                                 | 8           |
| Evans, 2007 <sup>40</sup>       | Scotland        | 2                  | 1                           | 1                               | 3                  | 2                  | 0                                     | 2                                 | 11          |
| Read, 2016 <sup>41</sup>        | Scotland        | 2                  | 1                           | 1                               | 3                  | 2                  | 1                                     | 2                                 | 12          |
| Berger, 1999 <sup>42</sup>      | Sweden          | 2                  | 1                           | 1                               | 2                  | 2                  | 0                                     | 1                                 | 9           |
| Jansson, 2015 <sup>43</sup>     | Sweden          | 2                  | 1                           | 1                               | 2                  | 2                  | 1                                     | 1                                 | 10          |
| Jansson, 2007 <sup>44</sup>     | Sweden          | 2                  | 0                           | 1                               | 2                  | 2                  | 1                                     | 2                                 | 10          |
| Ringborg, 2008 <sup>45</sup>    | Sweden          | 1                  | 1                           | 1                               | 3                  | 2                  | 1                                     | 1                                 | 10          |
| Huber, 2014 <sup>46</sup>       | Switzerland     | 2                  | 1                           | 1                               | 2                  | 2                  | 1                                     | 0                                 | 9           |
| Lin, 2013 <sup>47</sup>         | Taiwan          | 2                  | 1                           | 1                               | 3                  | 2                  | 1                                     | 1                                 | 11          |
| Tseng, 2006 <sup>48</sup>       | Taiwan          | 2                  | 1                           | 0                               | 2                  | 2                  | 0                                     | 1                                 | 8           |
| Ruwaard, 1996 <sup>38</sup>     | The Netherlands | 1                  | 1                           | 0                               | 2                  | 2                  | 1                                     | 0                                 | 7           |
| Holden, 2013 <sup>49</sup>      | UK              | 2                  | 1                           | 1                               | 3                  | 2                  | 1                                     | 2                                 | 12          |
| Zghebi, 2017 <sup>50</sup>      | UK              | 2                  | 1                           | 1                               | 3                  | 2                  | 1                                     | 2                                 | 12          |
| Abraham, 2015 <sup>7</sup>      | US              | 1                  | 0                           | 1                               | 4                  | 0                  | 1                                     | 0                                 | 7           |
| Akushevich, 2013 <sup>51</sup>  | US              | 2                  | 1                           | 1                               | 2                  | 2                  | 1                                     | 0                                 | 9           |
| Burke, 2002 <sup>52</sup>       | US              | 1                  | 1                           | 1                               | 3                  | 2                  | 1                                     | 1                                 | 10          |
| CDC, 2008 <sup>53</sup>         | US              | 1                  | 1                           | 1                               | 1                  | 1                  | 1                                     | 0                                 | 6           |
| Geiss, 2014 <sup>6</sup>        | Us              | 2                  | 1                           | 1                               | 1                  | 2                  | 1                                     | 2                                 | 10          |
| McBean, 2004 <sup>54</sup>      | US              | 2                  | 1                           | 1                               | 3                  | 2                  | 1                                     | 1                                 | 11          |
| Nichols, 2015 <sup>56</sup>     | US              | 1                  | 1                           | 1                               | 3                  | 2                  | 1                                     | 1                                 | 10          |
| Tabaei, 2012 <sup>57</sup>      | US              | 2                  | 1                           | 1                               | 1                  | 1                  | 1                                     | 0                                 | 7           |
| Weng, 2016 <sup>9</sup>         | US              | 2                  | 1                           | 1                               | 3                  | 2                  | 0                                     | 0                                 | 9           |
| Narayanan, 2010 <sup>55</sup>   | US, Alaska      | 2                  | 1                           | 0                               | 3                  | 2                  | 1                                     | 0                                 | 9           |
| Pavkov, 2007 <sup>58</sup>      | US, Pimas       | 2                  | 0                           | 1                               | 4                  | 1                  | 1                                     | 0                                 | 9           |

**Figure 1: Incidence of diabetes over time for those aged a) <40 years, b) 40 – 54 years, c) 55 –60 years, among incidence studies reporting age-specific data.**

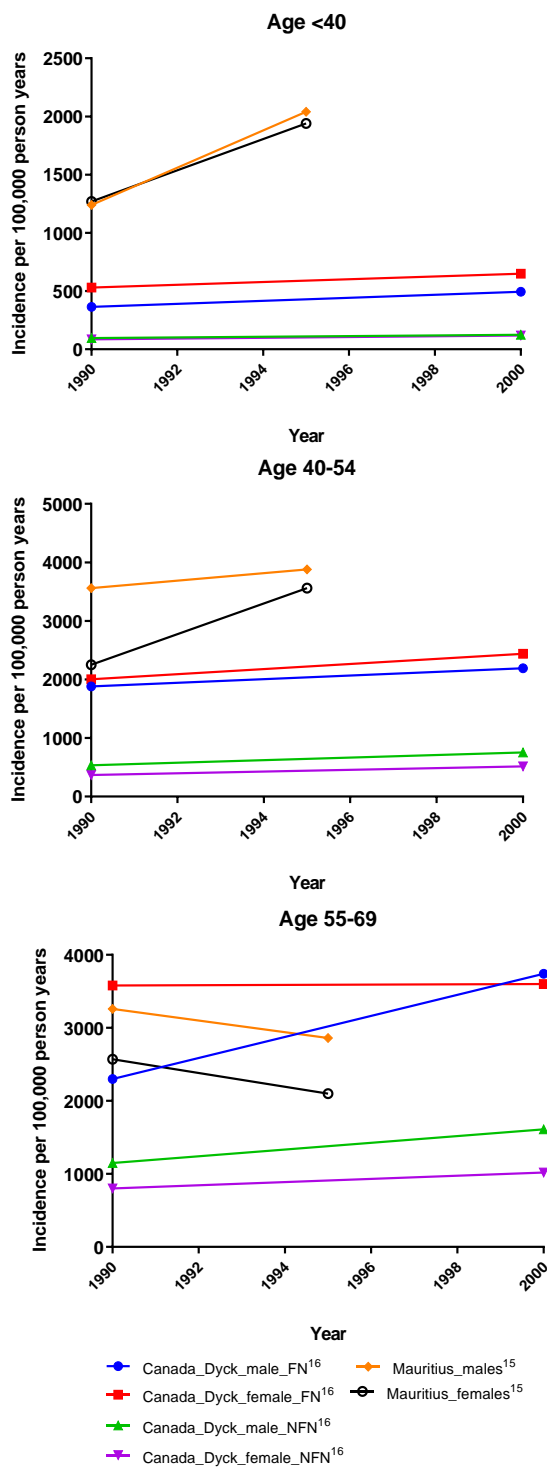

Supplement: magd049257.ww1.pdf [file magd049257.ww1.pdf]
