# Supplementary material for: Trends in incidence of total or type 2 diabetes: systematic review
Source: PubMed Central journal article supplement — BMJ. 2019 Sep 11;366:l5003. doi: 10.1136/bmj.l5003 (PMC6737490; doi:10.1136/bmj.l5003), 2019-09-11
Supplement: magd049257.ww2.pdf [file magd049257.ww2.pdf]

# A turning point for diabetes?

Results of a systematic review of trends in diabetes incidence

Prevention strategies could be contributing to a fall in diabetes incidence in some high income countries, according to a new systematic review published in *The BMJ*. Authors Magliano et al observed that after the year 2000, many populations identified in their review started to show declining rates of diabetes.

This graphic shows a subset of populations identified in the review that provided counts and denominators for diabetes incidence, separated into five different time periods

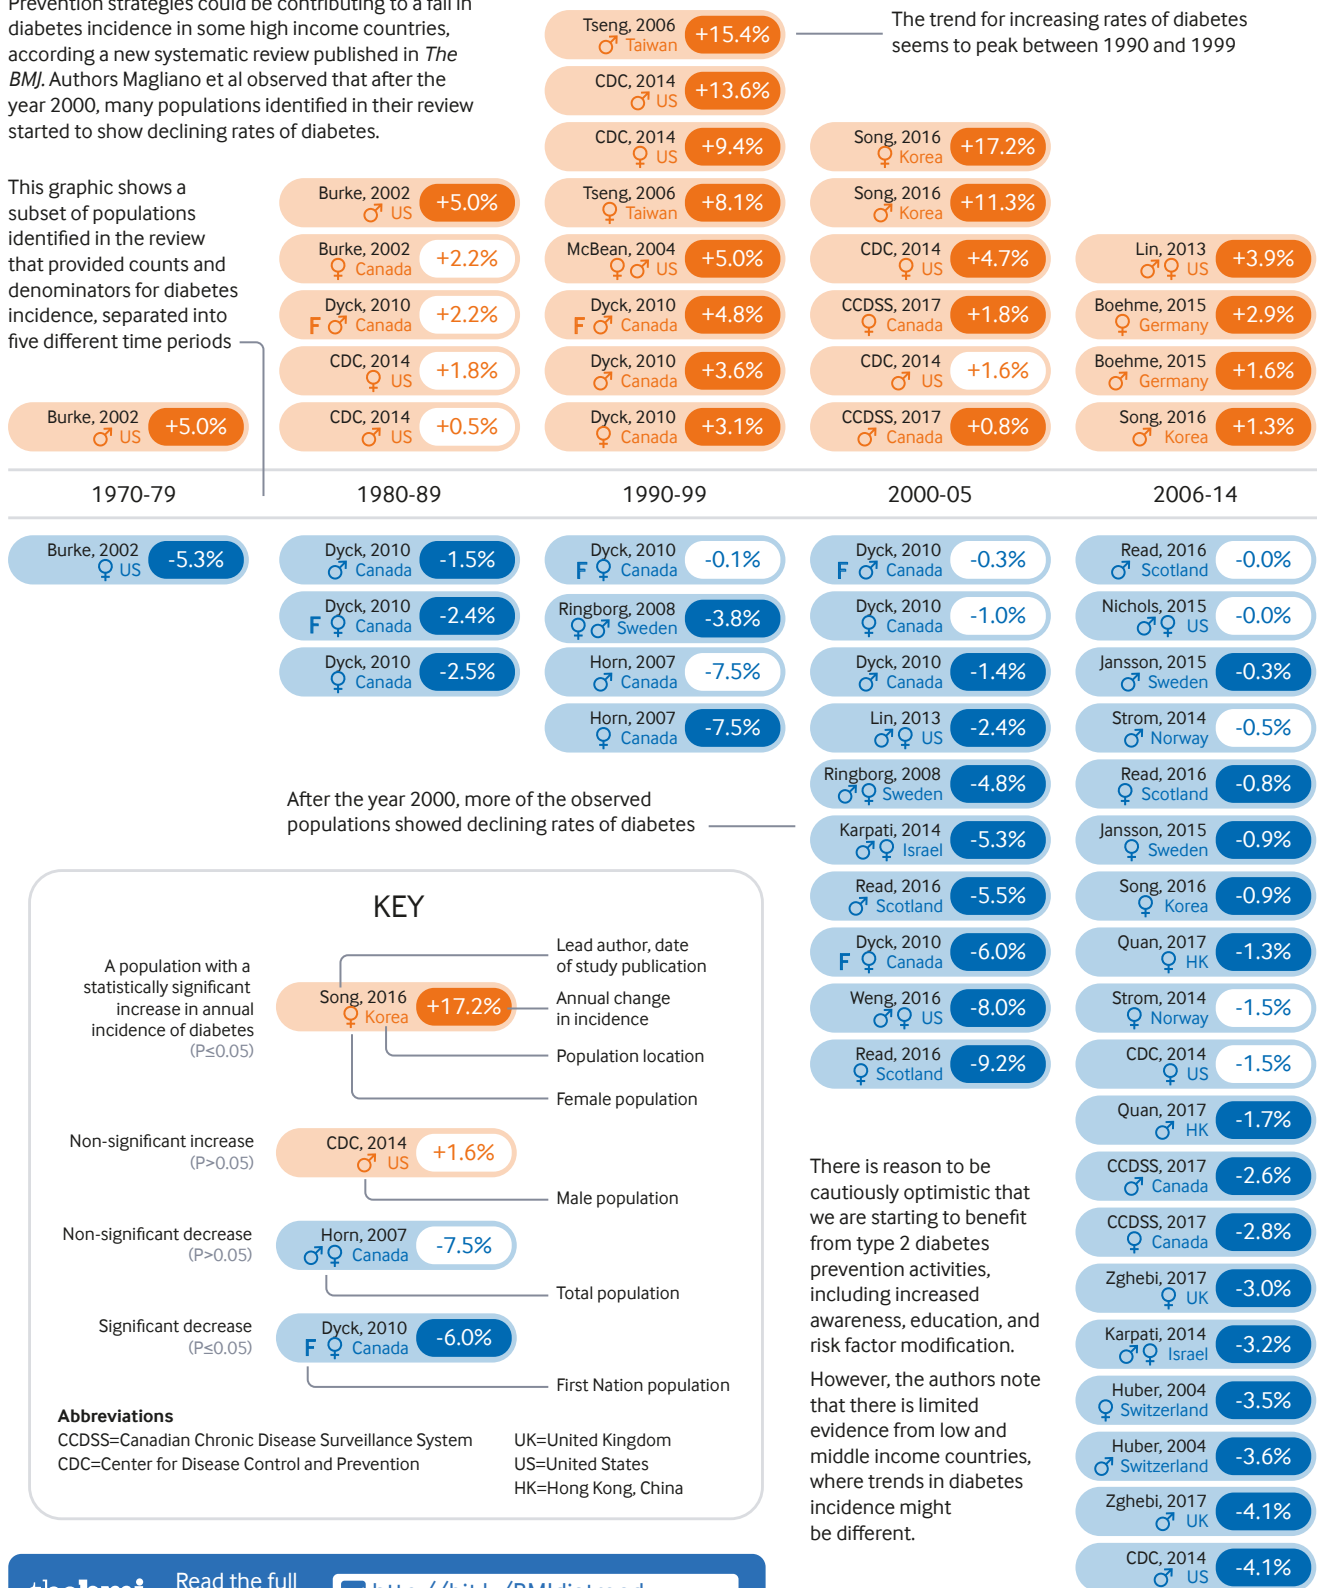

**KEY**

- Lead author, date of study publication
- Annual change in incidence
- Population location
- Female population
- Male population
- Total population
- First Nation population

A population with a statistically significant increase in annual incidence of diabetes (P<0.05)

Non-significant increase (P>0.05)

Non-significant decrease (P>0.05)

Significant decrease (P<0.05)

**Abbreviations**  
 CCDSS=Canadian Chronic Disease Surveillance System  
 CDC=Center for Disease Control and Prevention  
 UK=United Kingdom  
 US=United States  
 HK=Hong Kong, China

There is reason to be cautiously optimistic that we are starting to benefit from type 2 diabetes prevention activities, including increased awareness, education, and risk factor modification. However, the authors note that there is limited evidence from low and middle income countries, where trends in diabetes incidence might be different.
